# Supplementary material
Source: publisher figshare collection journal article supplement (https://aacr.figshare.com/ndownloader/files/39809750)
Supplement: Supplementary file 1 [file 39809750]

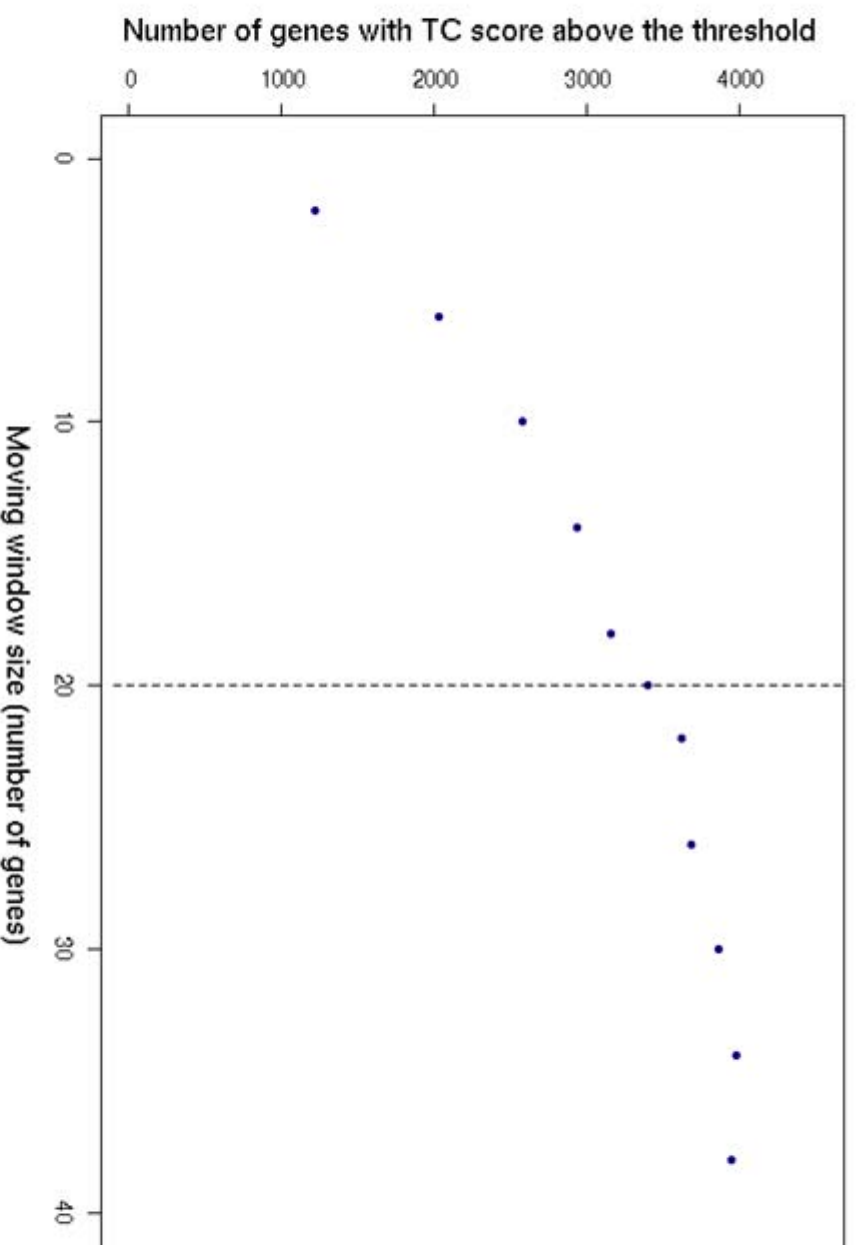

**Figure 1:** Number of genes with a TC score above the threshold as a function of the size of the moving window ( $2n$ ). Beyond  $2n=20$ , the number of correlated genes reaches a plateau.
